# Supplementary material
Source: MDPI journal article supplement (https://www.mdpi.com/1996-1073/16/10/4144)
Supplement: s1 [file s1]

| Core  | FA  | Sample | Textural nomenclature | Sand/% | Coarse to medium silt/% | Fine silt to clay/% |
|-------|-----|--------|-----------------------|--------|-------------------------|---------------------|
| TB-01 | FA7 | 55     | Medium mudstone       | 18.25  | 29.00                   | 52.76               |
|       |     | 56     | Medium mudstone       | 23.28  | 39.90                   | 36.82               |
|       |     | 57     | Medium mudstone       | 16.11  | 51.84                   | 32.05               |
|       |     | 58     | Sandy mudstone        | 35.06  | 23.52                   | 41.42               |
|       |     | 59     | Medium mudstone       | 14.90  | 31.14                   | 53.97               |
|       |     | 60     | Sandy mudstone        | 45.80  | 24.79                   | 29.40               |
|       |     | 61     | Medium mudstone       | 20.53  | 28.23                   | 51.24               |
|       | FA2 | 62     | Muddy sandstone       | 70.81  | 15.83                   | 13.36               |
|       | FA4 | 63     | Muddy sandstone       | 53.69  | 20.73                   | 25.59               |
|       | FA3 | 64     | Sandstone             | 78.95  | 6.90                    | 14.16               |
|       | FA2 | 65     | Muddy sandstone       | 69.76  | 10.54                   | 19.70               |
|       | FA5 | 66     | Sandy mudstone        | 45.67  | 30.39                   | 23.94               |
|       |     | 67     | Sandy mudstone        | 40.21  | 32.24                   | 27.55               |
|       |     | 68     | Muddy sandstone       | 60.95  | 19.66                   | 19.39               |
|       |     | 69     | Muddy sandstone       | 62.88  | 16.33                   | 20.79               |
|       |     | 70     | Muddy sandstone       | 57.71  | 18.33                   | 23.95               |
|       | FA2 | 71     | Sandstone             | 81.40  | 8.11                    | 10.50               |
|       |     | 72     | Muddy sandstone       | 67.30  | 16.93                   | 15.77               |
|       |     | 73     | Muddy sandstone       | 74.02  | 10.92                   | 15.06               |
| TB-02 | FA7 | 56     | Medium mudstone       | 15.74  | 28.40                   | 55.86               |
|       |     | 57     | Sandy mudstone        | 33.67  | 27.19                   | 39.14               |
|       |     | 58     | Medium mudstone       | 13.22  | 29.98                   | 56.80               |
|       |     | 59     | Medium mudstone       | 18.11  | 43.49                   | 38.39               |
|       |     | 60     | Medium mudstone       | 16.76  | 31.96                   | 51.28               |
|       |     | 61     | Medium mudstone       | 21.32  | 31.83                   | 46.85               |
|       | FA6 | 62     | Sandy mudstone        | 31.87  | 26.58                   | 41.55               |
|       |     | 63     | Sandy mudstone        | 26.52  | 29.40                   | 44.07               |
|       |     | 64     | Sandy mudstone        | 30.10  | 30.15                   | 39.75               |
|       |     | 65     | Medium mudstone       | 23.48  | 33.40                   | 43.12               |
|       |     | 66     | Sandy mudstone        | 28.63  | 32.27                   | 39.10               |
|       |     | 67     | Sandy mudstone        | 32.70  | 27.91                   | 39.40               |
|       |     | 68     | Sandy mudstone        | 34.89  | 30.85                   | 34.26               |
|       |     | 69     | Muddy sandstone       | 55.40  | 19.41                   | 25.19               |
|       | FA2 | 70     | Muddy sandstone       | 65.06  | 9.69                    | 25.25               |
|       |     | 71     | Muddy sandstone       | 64.47  | 14.06                   | 21.47               |
|       |     | 72     | Muddy sandstone       | 57.29  | 15.26                   | 27.45               |
|       |     | 73     | Muddy sandstone       | 61.66  | 11.38                   | 26.96               |
|       | FA1 | 74     | Muddy sandstone       | 73.44  | 7.92                    | 18.63               |
|       |     | 75     | Muddy sandstone       | 69.58  | 8.76                    | 21.67               |
|       |     | 76     | Sandstone             | 75.73  | 8.39                    | 15.88               |
|       |     | 77     | Sandstone             | 75.71  | 6.60                    | 17.69               |
|       |     | 78     | Sandstone             | 75.17  | 9.22                    | 15.61               |
|       |     | 79     | Muddy sandstone       | 69.27  | 12.11                   | 18.63               |
|       |     | 80     | Muddy sandstone       | 74.77  | 8.38                    | 16.85               |

| Core  | FA  | Sample | Textural nomenclature | Sand/% | Coarse to medium silt/% | Fine silt to clay/% |
|-------|-----|--------|-----------------------|--------|-------------------------|---------------------|
| TB-03 | FA2 | 18     | Muddy sandstone       | 67.03  | 9.95                    | 23.03               |
|       |     | 19     | Sandstone             | 86.18  | 4.21                    | 9.61                |
|       |     | 20     | Sandstone             | 88.28  | 3.40                    | 8.32                |
|       |     | 21     | Sandstone             | 90.23  | 3.18                    | 6.59                |
|       |     | 22     | Sandstone             | 86.67  | 3.86                    | 9.47                |
|       |     | 23     | Sandstone             | 89.82  | 2.30                    | 7.87                |
|       |     | 24     | Sandstone             | 86.46  | 4.64                    | 8.90                |
|       |     | 25     | Sandstone             | 81.43  | 3.35                    | 15.21               |
|       |     | 26     | Sandstone             | 89.96  | 2.76                    | 7.28                |
|       |     | 27     | Sandstone             | 87.95  | 3.90                    | 8.15                |
|       |     | 28     | Sandstone             | 90.51  | 3.27                    | 6.22                |
|       |     | 29     | Sandstone             | 88.42  | 3.37                    | 8.22                |
|       |     | 30     | Sandstone             | 92.09  | 2.38                    | 5.54                |
|       |     | 31     | Sandstone             | 82.41  | 5.82                    | 11.77               |
|       |     | 32     | Sandstone             | 90.10  | 3.10                    | 6.79                |
|       |     | 33     | Muddy sandstone       | 65.96  | 9.67                    | 24.37               |
|       |     | 34     | Sandstone             | 82.01  | 5.93                    | 12.05               |
|       |     | 35     | Sandstone             | 83.29  | 4.98                    | 11.73               |
|       |     | 36     | Sandstone             | 81.03  | 5.75                    | 13.22               |
|       |     | 37     | Sandstone             | 82.34  | 5.59                    | 12.07               |
|       |     | 38     | Sandstone             | 90.01  | 3.34                    | 6.65                |
|       |     | 39     | Sandstone             | 88.75  | 4.03                    | 7.22                |
| LX-8  | FA3 | 97     | Muddy sandstone       | 72.51  | 13.41                   | 14.08               |
|       |     | 98     | Muddy sandstone       | 69.36  | 14.45                   | 16.18               |
